# Supplementary material for: Cardioversion Efficacy Using Pulsed Biphasic or Biphasic Truncated Exponential Waveforms: A Randomized Clinical Trial
Source: PubMed Central journal article supplement — J Am Heart Assoc. 2017 Mar 8;6(3):e004853. doi: 10.1161/JAHA.116.004853 (PMC5524016; doi:10.1161/jaha.116.004853), 2017-03-08
Supplement: JAH3-6-e004853-s001.pdf [file JAH3-6-e004853-s001.pdf]

# **SUPPLEMENTAL MATERIAL**

**Table S1.** Characteristics of the 116 patients with atrial fibrillation and the 18 patients with atrial flutter.

| Patient's characteristics                                | <i>AF patients</i> |                 | <i>Atrial flutter patients</i> |                 |
|----------------------------------------------------------|--------------------|-----------------|--------------------------------|-----------------|
|                                                          | PB<br>waveform     | BTE<br>waveform | PB<br>waveform                 | BTE<br>waveform |
| <i>Demographics</i>                                      |                    |                 |                                |                 |
| No. of patients                                          | 60                 | 56              | 9                              | 9               |
| Age, years (mean $\pm$ SD)                               | 66 $\pm$ 9         | 66 $\pm$ 9      | 68 $\pm$ 11                    | 70 $\pm$ 5      |
| Male sex (%)                                             | 43 (72)            | 42 (75)         | 8 (89)                         | 9 (100)         |
| Atrial flutter                                           | -                  | -               | -                              | -               |
| AF or -flutter duration in months,<br>median (quartiles) | 3 (2; 9)           | 5 (2; 23)       | 3 (2; 7)                       | 8 (3; 44)       |
| Prior cardioversions, median<br>(quartiles)              | 0 (0; 0.25)        | 0 (0; 1)        | 0 (0; 0)                       | 1 (0; 3)        |
| Prior ablation, median (quartiles)                       | 0 (0; 0)           | 0 (0; 0)        | 0 (0; 0)                       | 0 (0; 1)        |
| <i>Comorbidities, %</i>                                  |                    |                 |                                |                 |
| Hypertension                                             | 46 (77)            | 45 (80)         | 5 (56)                         | 6 (67)          |
| Congestive heart failure                                 | 18 (30)            | 10 (18)         | 2 (22)                         | 2 (22)          |
| Valvular heart disease                                   | 2 (3)              | 6 (11)          | 1 (11)                         | 1 (11)          |
| Thyroid disease                                          | 0 (0)              | 2 (4)           | 0 (0)                          | 0 (0)           |
| Prior stroke/transient ischemic attack                   | 6 (10)             | 4 (7)           | 0 (0)                          | 0 (0)           |
| Prior myocardial infarction                              | 1 (2)              | 5 (9)           | 0 (0)                          | 0 (0)           |
| Ischemic heart disease                                   | 12 (20)            | 12 (21)         | 1 (11)                         | 0 (0)           |
| Hyperlipidemia                                           | 25 (42)            | 26 (46)         | 4 (44)                         | 2 (22)          |
| Chronic obstructive pulmonary disease                    | 2 (3)              | 4 (7)           | 0 (0)                          | 1 (11)          |

*Cardiac medication, %*

|                            |         |         |        |        |
|----------------------------|---------|---------|--------|--------|
| Amiodarone                 | 6 (10)  | 14 (25) | 0 (0)  | 4 (44) |
| Digoxin                    | 13 (22) | 17 (30) | 1 (11) | 1 (11) |
| Flecainide                 | 1 (2)   | 1 (2)   | 0 (0)  | 0 (0)  |
| ACE/Angiotensin-II blocker | 41 (68) | 36 (64) | 3 (33) | 4 (44) |
| Beta blocker               | 49 (82) | 46 (82) | 8 (89) | 7 (78) |
| Calcium antagonist         | 16 (26) | 18 (32) | 0 (0)  | 2 (22) |

*Vital parameters and laboratory data*

|                                                          |                      |                     |                      |                      |
|----------------------------------------------------------|----------------------|---------------------|----------------------|----------------------|
| Body mass index, kg/m <sup>2</sup>                       | 29 ±6                | 31 ±5               | 28 ±5                | 28 ±7                |
| Systolic blood pressure, mmHg                            | 136 ±17              | 136 ±22             | 132 ±22              | 133 ±17              |
| Diastolic blood pressure, mmHg                           | 82 ±14               | 80 ±13              | 77 ±13               | 78 ±12               |
| Heart rate before cardioversion, min <sup>-1</sup>       | 80 ±18               | 81 ±18              | 76 ±18               | 74 ±18               |
| Estimated glomerular filtration rate                     | 69 ±14               | 69 ±18              | 68 ±16               | 66 ±15               |
| Hemoglobin (mmol/L)                                      | 9.3 ±0.8             | 9.4 ±0.9            | 8.9 ±0.7             | 8.9 ±1.0             |
| Thyroid-stimulating hormone<br>(IU x10 <sup>-3</sup> /L) | 1.47<br>(1.00; 2.45) | 1.67<br>(0.92;2.64) | 1.70<br>(1.37; 2.59) | 1.52<br>(1.19; 2.22) |
| Total propofol dose (mg)                                 | 116 ±44              | 108 ±35             | 89 ±26               | 96 ±14               |

*Patient's symptoms (EHRA Score), %*

|     |         |         |        |        |
|-----|---------|---------|--------|--------|
| I   | 27 (45) | 22 (39) | 4 (44) | 4 (44) |
| II  | 28 (47) | 24 (43) | 3 (33) | 5 (56) |
| III | 5 (8)   | 10 (18) | 2 (22) | 0 (0)  |
| IV  | 0 (0)   | 0 (0)   | 0 (0)  | 0 (0)  |

---

Abbreviations: PB; Pulsed biphasic, BTE; Biphasic truncated exponential, AF; Atrial fibrillation, ACE;

Angiotensin converting enzyme, EHRA; European Heart Rhythm Association score of AF-related symptoms.

**Table S2.** Characteristics of the 24 patients receiving amiodarone treatment and the 110 patients not receiving amiodarone.

| Patient's characteristics                                | <i>Receiving amiodarone</i> |                 | <i>Not receiving amiodarone</i> |                 |
|----------------------------------------------------------|-----------------------------|-----------------|---------------------------------|-----------------|
|                                                          | PB<br>waveform              | BTE<br>waveform | PB<br>waveform                  | BTE<br>waveform |
| <i>Demographics</i>                                      |                             |                 |                                 |                 |
| No. of patients                                          | 6                           | 18              | 63                              | 47              |
| Age, years (mean $\pm$ SD)                               | 59 $\pm$ 10                 | 66 $\pm$ 9      | 67 $\pm$ 9                      | 67 $\pm$ 8      |
| Male sex (%)                                             | 5 (83)                      | 16 (89)         | 46 (73)                         | 35 (75)         |
| Atrial flutter                                           | 9 (13)                      | 9 (14)          | 9 (13)                          | 9 (14)          |
| AF or –flutter duration in months,<br>median (quartiles) | 11 (9; 18)                  | 22 (5; 37)      | 3 (2; 7)                        | 4 (2; 17)       |
| Prior cardioversions, median<br>(quartiles)              | 1 (1; 1.75)                 | 2 (0.25; 3)     | 0 (0; 0)                        | 0 (0; 0)        |
| Prior pulmonary vein ablation, median<br>(quartiles)     | 0 (0; 0)                    | 0 (0; 1)        | 0 (0; 0)                        | 0 (0; 0)        |
| <i>Comorbidities, %</i>                                  |                             |                 |                                 |                 |
| Hypertension                                             | 0 (0)                       | 14 (78)         | 45 (71)                         | 37 (79)         |
| Congestive heart failure                                 | 3 (50)                      | 4 (22)          | 7 (27)                          | 8 (17)          |
| Valvular heart disease                                   | 0 (0)                       | 3 (17)          | 3 (5)                           | 4 (9)           |
| Thyroid disease                                          | 0 (0)                       | 1 (6)           | 0 (0)                           | 1 (2)           |
| Prior stroke/transient ischemic attack                   | 0 (0)                       | 0 (0)           | 6 (10)                          | 4 (8)           |
| Prior myocardial infarction                              | 0 (0)                       | 1 (6)           | 1 (2)                           | 4 (9)           |
| Ischemic heart disease                                   | 2 (33)                      | 3 (17)          | 11 (17)                         | 9 (19)          |
| Hyperlipidemia                                           | 2 (33)                      | 7 (39)          | 27 (43)                         | 21 (45)         |
| Chronic obstructive pulmonary disease                    | 0 (0)                       | 1 (6)           | 2 (3)                           | 4 (9)           |

*Cardiac medication, %*

|                             |         |         |         |         |
|-----------------------------|---------|---------|---------|---------|
| Amiodarone                  | -       | -       | -       | -       |
| Digoxin                     | 0 (0)   | 4 (22)  | 14 (22) | 14 (30) |
| Flecainide                  | 0 (0)   | 1 (6)   | 1 (2)   | 0 (0)   |
| ACE/Angiotensin-II blockers | 6 (100) | 10 (55) | 38 (60) | 30 (64) |
| Beta blockers               | 4 (67)  | 11 (61) | 53 (84) | 42 (89) |
| Calcium channel blockers    | 3 (50)  | 4 (22)  | 13 (21) | 16 (34) |

*Vital parameters and laboratory data*

|                                                          |                      |                     |                      |                      |
|----------------------------------------------------------|----------------------|---------------------|----------------------|----------------------|
| Body mass index, kg/m <sup>2</sup>                       | 31 ±5                | 29 ±4               | 29 ±6                | 30 ±6                |
| Systolic blood pressure, mmHg                            | 145 ±15              | 130 ±22             | 135 ±18              | 137 ±21              |
| Diastolic blood pressure, mmHg                           | 91 ±11               | 80 ±14              | 81 ±14               | 79 ±13               |
| Heart rate before cardioversion, min <sup>-1</sup>       | 86 ±27               | 85 ±25              | 80 ±20               | 79 ±14               |
| Estimated glomerular filtration rate                     | 71 ±17               | 64 ±19              | 69 ±14               | 70 ±16               |
| Hemoglobin (mmol/L)                                      | 9.3 ±0.9             | 9.2 ±0.9            | 9.3 ±0.8             | 9.3 ±0.9             |
| Thyroid-stimulating hormone<br>(IU x10 <sup>-3</sup> /L) | 3.00<br>(2.18; 3.69) | 1.65<br>(1.08;2.70) | 1.47<br>(0.99; 2.30) | 1.67<br>(0.94; 2.44) |
| Total propofol dose (mg)                                 | 125 ±30              | 103 ±30             | 112 ±43              | 108 ±30              |

*Patient's symptoms (EHRA Score), %*

|     |        |         |         |         |
|-----|--------|---------|---------|---------|
| I   | 3 (50) | 5 (28)  | 28 (44) | 21 (45) |
| II  | 3 (50) | 10 (56) | 28 (44) | 19 (41) |
| III | 0 (0)  | 3 (17)  | 7 (11)  | 7 (15)  |
| IV  | 0 (0)  | 0 (0)   | 0 (0)   | 0 (0)   |

---

Abbreviations: PB; Pulsed biphasic, BTE; Biphasic truncated exponential, AF; Atrial fibrillation, ACE;

Angiotensin converting enzyme, EHRA; European Heart Rhythm Association score of AF-related symptoms.
